# Supplementary material for: Scrutinizing pathogenicity of the USH2A c.2276 G > T; p.(Cys759Phe) variant
Source: PubMed Central journal article supplement (PMC9174243; doi:10.1038/s41525-022-00306-z), 2022-06-07
Supplement: 41525_2022_306_MOESM1_ESM.pdf [file 41525_2022_306_MOESM1_ESM.pdf]

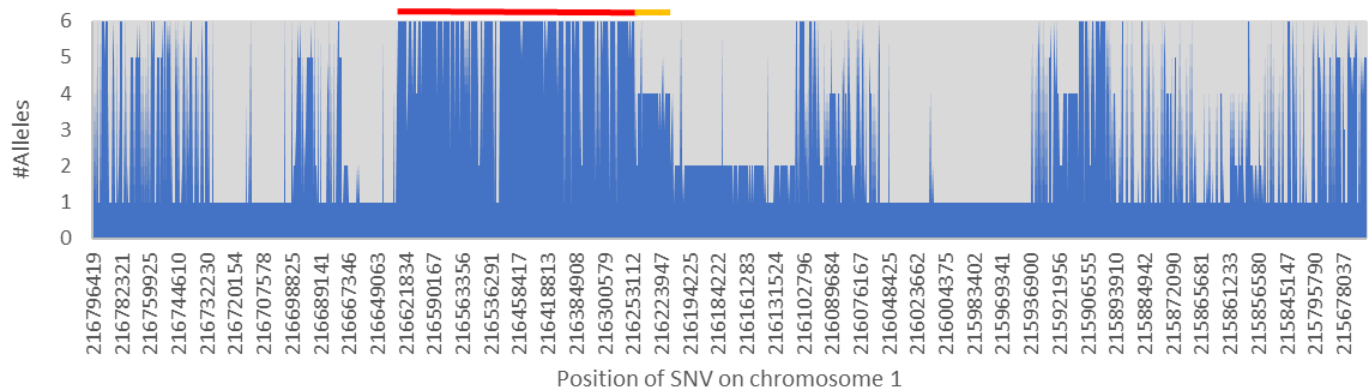

**Supplementary Figure 1: Identification of a shared haplotype block associated with the *USH2A* c.2276G>T variant.**

All single nucleotide variants (SNVs, n=1,615) in *USH2A* and 200 kilobases of flanking regions were extracted for all three cases homozygous for the *USH2A* c.2276G>T variant and the number of alleles carrying each SNV was determined. The majority of SNVs is shared amongst all alleles from chr1:216632415 (hg19, 35 kb upstream of *USH2A*) to chr1:216247667 (*USH2A* intron 27) (indicated with the red bar) or four alleles until chr1:216211989 (*USH2A* intron 32) (indicated with the orange bar).

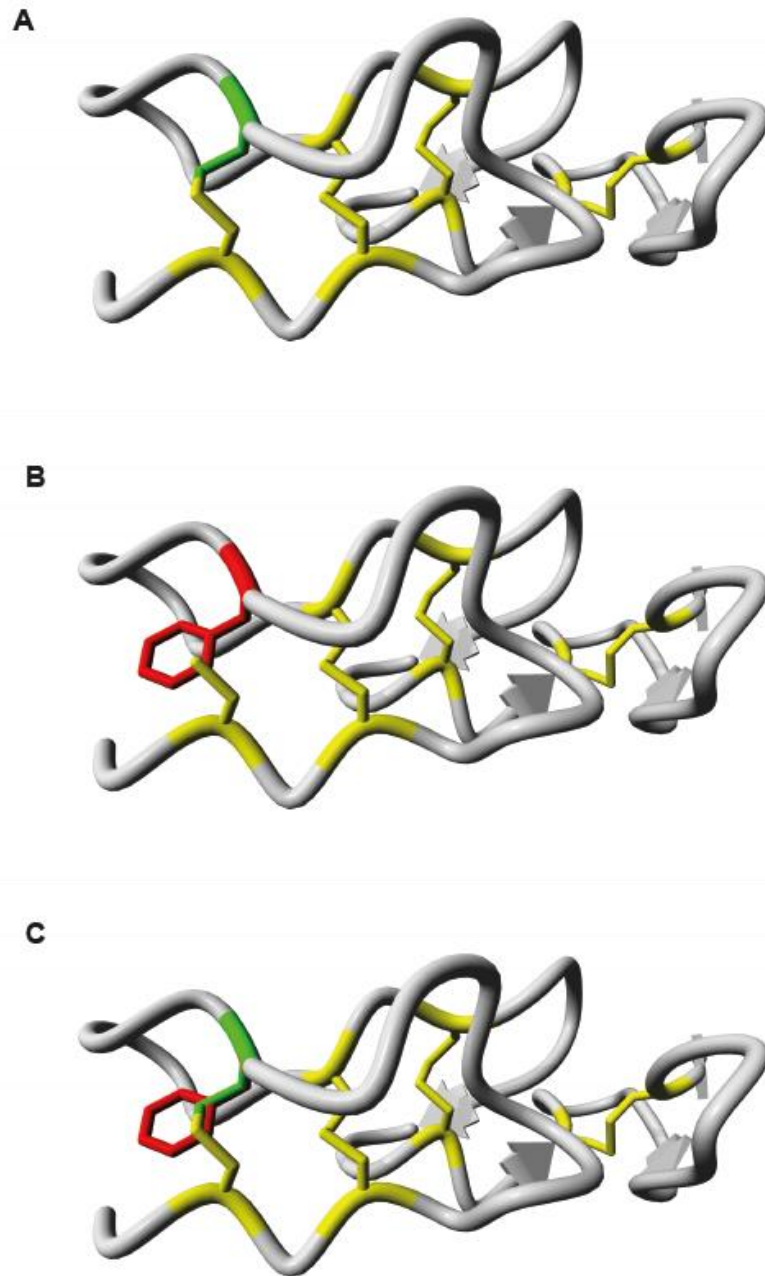

**Supplementary Figure 2: *In silico* modeling of the usherin fifth laminin–epidermal growth factor like domain.**

(A) p.(Cys759Phe) affects the fifth laminin–epidermal growth factor like domain of usherin. The cysteine residue at position 759 is depicted in green. Other cysteine residues and the disulfide bridges that are formed are depicted in yellow. (B) In red is the effect of the substitution of phenylalanine for cysteine. (C) A combined p.(Cys759Phe) model suggests the loss of a covalent cysteine bond which is detrimental for usherin folding and function.

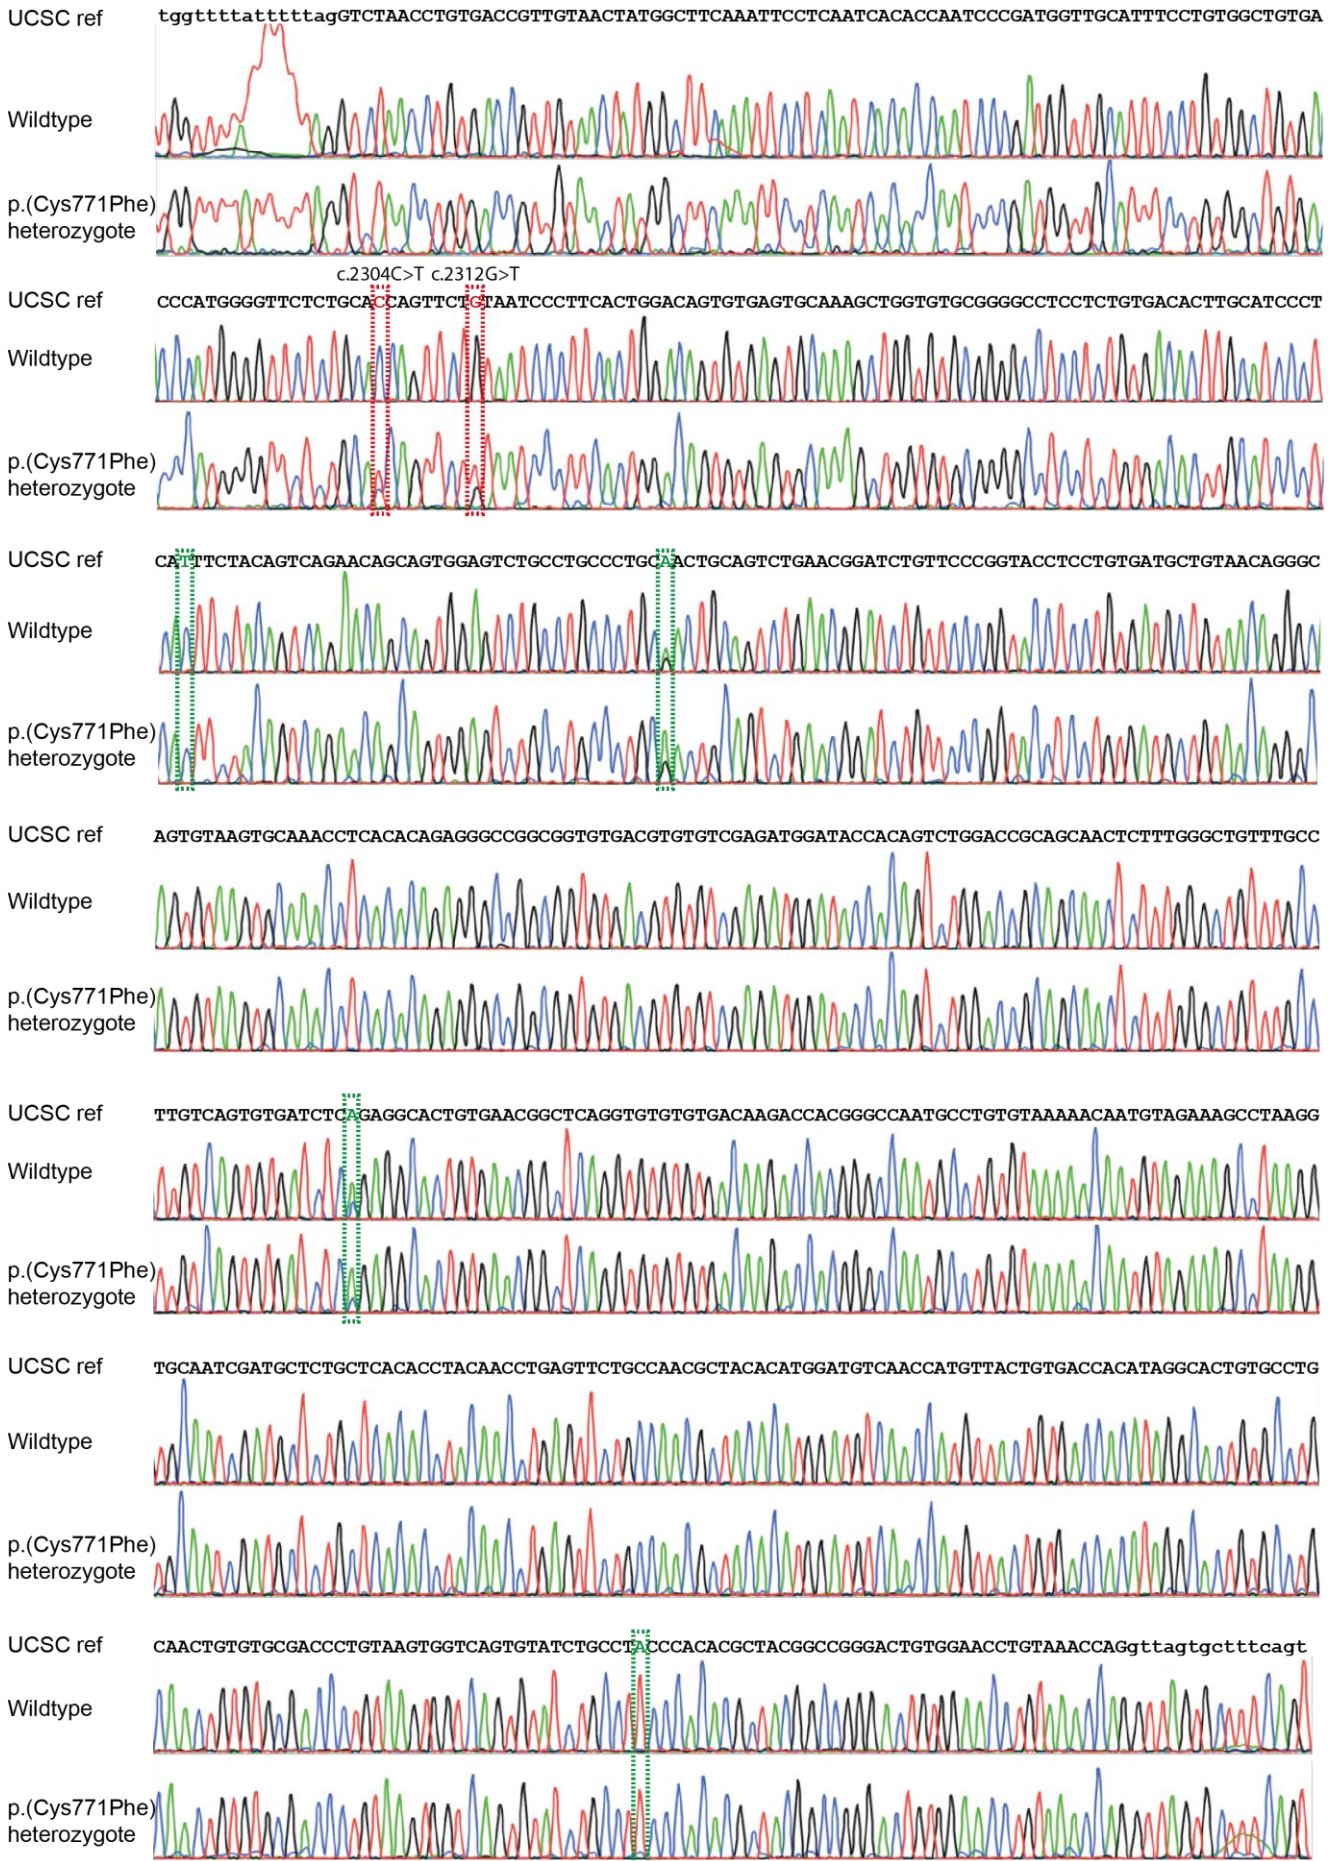

**Supplementary Figure 3: Sanger sequencing traces of *ush2a* exon 13 and exon-intron boundaries.** Sequence traces derived from genomic DNA of heterozygous p.(Cys771Phe) zebrafish (F1), strain-matched wildtypes and the UCSC reference sequence are shown. Variants c.2311G>T (p.(Cys771Phe)) and c.2304C>T (protospacer-adjacent motif-disrupting variant) are framed in red, deviations from the reference genome that were also identified in genomic DNA of wildtype zebrafish are framed in green. Nucleotides encoding exon 13 are in upper case, flanking intronic sequences in lower case. UCSC ref: UCSC reference genome (GRCz10/danRer10).

**Supplementary Table 1: All single nucleotide variants in arRP-associated genes that met our pathogenicity criteria.**

| Sample zygosity | Gene name       | Genomic position (hg19)    | Variant             | Protein effect | phyloP | CADD_PHRED | Grantham Score | gnomAD-G AF (%) | SpliceAI_AG | SpliceAI_AL | SpliceAI_DG | SpliceAI_DL |
|-----------------|-----------------|----------------------------|---------------------|----------------|--------|------------|----------------|-----------------|-------------|-------------|-------------|-------------|
| I (het)         | <i>ADGRA3</i>   | 4:g.22390410A>T            | c.2884T>A           | p.(Leu962Met)  | 0.1    | 23.1       | 15             | 0.01            | 0           | 0           | 0           | 0           |
| I (het)         | <i>CLCC1</i>    | 1:g.109479994A>G           | c.725T>C            | p.(Ile242Thr)  | 3.8    | 17.4       | 89             | 0.003           | 0           | 0           | 0.05        | 0           |
| I (het)         | <i>MVK</i>      | 12:g.110015065C>T          | c.226+1115C>T       |                | -0.6   | 0.1        | 0              | 0.1             | 0           | 0.04        | 0           | 0.12        |
| I (het)         | <i>NEK2</i>     | 1:g.211832090dup           | c.1112-8dup         |                | 0.3    | 7.8        | 0              | -               | 0           | 0           | 0           | 0           |
| I (het)         | <i>NEK2</i>     | 1:g.211832087_211832090dup | c.1112-11_1112-8dup |                | 0.3    | 7.8        | 0              | -               | 0           | 0           | 0           | 0           |
| I (het)         | <i>PDE6B</i>    | 4:g.646317G>C              | c.712-1324G>C       |                | -0.8   | 4.8        | 0              | 0.4             | 0           | 0           | 0           | 0.11        |
| I (het)         | <i>POMGNT1</i>  | 1:g.46664028C>G            | c.-71G>C            |                | -0.6   | 14.7       | 0              | -               | 0           | 0           | 0.01        | 0.11        |
| I (het)         | <i>RP1</i>      | 8:g.55534671T>C            | c.616-6T>C          |                | 1.3    | 15.8       | 0              | 0.4             | 0.01        | 0.26        | 0           | 0.24        |
| I (het)         | <i>RP1L1</i>    | 8:g.10480144G>A            | c.568C>T            | p.(Arg190Cys)  | 5.2    | 15.9       | 180            | 0.2             | 0           | 0.01        | 0           | 0           |
| II (het)        | <i>ABCA4</i>    | 1:g.94514466T>C            | c.2701A>G           | p.(Thr901Ala)  | 2.4    | 17.0       | 58             | 0.1             | 0           | 0.01        | 0           | 0           |
| II (het)        | <i>ARL6</i>     | 3:g.97485464A>T            | c.-28+531A>T        |                | -1.1   | 0.5        | 0              | 0.5             | 0.29        | 0           | 0.18        | 0           |
| II (het)        | <i>EYS</i>      | 6:g.65823605A>T            | c.2024-55985T>A     |                | -1.3   | 1.2        | 0              | -               | 0           | 0.19        | 0           | 0.08        |
| II (het)        | <i>EYS</i>      | 6:g.65823607G>T            | c.2024-55987C>A     |                | 0.5    | 3.3        | 0              | -               | 0           | 0.21        | 0           | 0.09        |
| II (het)        | <i>FAM161A</i>  | 2:g.62069482G>A            | c.197C>T            | p.(Thr66Ile)   | 1.2    | 15.7       | 89             | 0.5             | 0           | 0           | 0           | 0           |
| II (het)        | <i>IFT172</i>   | 2:g.27677214A>G            | c.3530+7T>C         |                | 0.0    | 10.6       | 0              | 0.1             | 0           | 0           | 0.02        | 0           |
| II (het)        | <i>RP1L1</i>    | 8:g.10480341G>A            | c.371C>T            | p.(Pro124Leu)  | 1.2    | 17.9       | 98             | 0.003           | 0           | 0           | 0           | 0           |
| II (het)        | <i>RPE65</i>    | 1:g.68906655T>C            | c.524A>G            | p.(Asn175Ser)  | 7.6    | 23.9       | 46             | -               | 0.02        | 0.02        | 0           | 0.03        |
| III (het)       | <i>ARHGEF18</i> | 19:g.7515874C>T            | c.700-161C>T        |                | -0.2   | 3.3        | 0              | -               | 0           | 0           | 0.2         | 0.01        |
| III (het)       | <i>DHX38</i>    | 16:g.72135487C>T           | c.1475C>T           | p.(Thr492Met)  | 4.6    | 20.9       | 81             | 0.2             | 0.01        | 0           | 0           | 0           |
| III (het)       | <i>SLC7A14</i>  | 3:g.170244598G>A           | c.128C>T            | p.(Thr43Met)   | 3.8    | 19.5       | 81             | -               | 0           | 0           | 0.01        | 0.01        |
| All cases (hom) | <i>USH2A</i>    | 1:g.216420460C>A           | c.2276G>T           | p.(Cys759Phe)  | 5.5    | 28.9       | 205            | 0.1             | 0.03        | 0           | 0.01        | 0           |

No pathogenic homozygous or compound heterozygous single nucleotide variants, with the exception of *USH2A* c.2276G>T, could be observed in the three cases. The

variants in *EYS* in case II are in *cis*. Variants in *RP1* and *RP1L1* are also associated with autosomal dominant RP, the variants in these genes identified in cases I and II are

classified as (likely) benign in ClinVar. GnomAD-G AF: Genome Aggregation Database: allele frequency in genome sequencing data, het: heterozygous, hom: homozygous.

Splice prediction scores are obtained with SpliceAI<sup>1</sup>. AG: acceptor gain, AL: acceptor loss, DG: donor gain, DL: donor loss.

**Supplementary Table 2: Rare single nucleotide variants in *USH2A* that are shared amongst cases.**

| Variant (NM_206933.2)      | Protein effect | Sample zygosity                    | phyloP | CADD_PHRED | Grantham Score | gnomAD-G AF (%) | SpliceAI_AG | SpliceAI_AL | SpliceAI_DG | SpliceAI_DL | SpliceSiteFinder-like (threshold: 75/100) | MaxEntScan (threshold AS: 12/16, DS: 9/12) | NNSPLICE (threshold : 0.75/1)   | GeneSplicer (threshold AS: 15.75/21, DS: 18/24) |
|----------------------------|----------------|------------------------------------|--------|------------|----------------|-----------------|-------------|-------------|-------------|-------------|-------------------------------------------|--------------------------------------------|---------------------------------|-------------------------------------------------|
| c.11712-206_11712-199dup   |                | I (hom),<br>II (hom),<br>III (het) | 0.6    | 1.7        | 0              | -               | na          | na          | na          | na          | -                                         | -                                          | -                               | -                                               |
| c.6806-2881del             |                | I (hom),<br>II (het),<br>III (hom) | -      | 2.5        | 0              | -               | 0.04        | 0           | 0.03        | 0           | -                                         | -                                          | -                               | -                                               |
| c.4628-23020_4628-23007del |                | I (hom),<br>II (hom),<br>III (hom) | 1.5    | 4.9        | 0              | -               | na          | na          | na          | na          | -                                         | -                                          | -                               | -                                               |
| c.2276G>T                  | p.(Cys759Phe)  | I (hom),<br>II (hom),<br>III (hom) | 5.5    | 28.9       | 205            | 0.1             | 0.03        | 0           | 0.01        | 0           | -                                         | -                                          | -                               | -                                               |
| c.2256T>C                  | p.(His752=)    | I (hom),<br>II (het),<br>III (hom) | -0.9   | 4.3        | 0              | 0.08            | 0.06        | 0.01        | 0.02        | 0           | -                                         | -                                          | -                               | -                                               |
| c.1971+7414dup             |                | I (hom),<br>II (het),<br>III (hom) | -0.9   | 0.6        | 0              | -               | na          | na          | na          | na          | -                                         | -                                          | -                               | -                                               |
| c.784+9428A>G              |                | I (hom),<br>II (hom),<br>III (hom) | -0.8   | 4.0        | 0              | 0.1             | 0           | 0           | 0           | 0           | Gain of AS: 79.4 to 79.6 (0.2%)           | -                                          | Gain of AS of 0.75 to 0.77 (2%) | -                                               |

GnomAD-G AF: Genome Aggregation Database: allele frequency in genome sequencing data, het: heterozygous, hom: homozygous. Splice prediction scores are obtained

with SpliceAI<sup>1</sup>, SpliceSiteFinder-like<sup>2</sup>, MaxEntScan<sup>3</sup>, NNSPLICE<sup>4</sup> and GeneSplicer<sup>5</sup>. AG: acceptor gain, AL: acceptor loss, DG: donor gain, DL: donor loss, AS: acceptor site, DS: donor site.

**Supplementary Table 3:** Genomic positions of putative *USH2A* regulatory regions and predicted *USH2A* promoter

| #  | Location (hg19)          | Location (hg38)          | Gene         | Component | Human retina <sup>6</sup> | Mouse retina <sup>7</sup> | Mouse inner ear <sup>8,9</sup> | GeneHancer <sup>10</sup> | Cherry <i>et al.</i> <sup>6</sup> |
|----|--------------------------|--------------------------|--------------|-----------|---------------------------|---------------------------|--------------------------------|--------------------------|-----------------------------------|
| 1  | chr1:216204347-216205162 | chr1:216031005-216031820 | <i>USH2A</i> | Intron 32 | +                         | +                         | -                              | -                        | -                                 |
| 2  | chr1:216228020-216228354 | chr1:216054678-216055012 |              | Intron 30 | +                         | +                         | -                              | +                        | +                                 |
| 3  | chr1:216263772-216264789 | chr1:216090430-216091447 |              | Intron 22 | +                         | +                         | -                              | +                        | -                                 |
| 4  | chr1:216394480-216394958 | chr1:216221138-216221616 |              | Intron 14 | +                         | -                         | -                              | +                        | +                                 |
| 5  | chr1:216408087-216408663 | chr1:216234745-216235321 |              | Intron 13 | +                         | +                         | -                              | +                        | -                                 |
| 6  | chr1:216560998-216562963 | chr1:216387656-216389621 |              | Intron 3  | +                         | -                         | -                              | ++                       | -                                 |
| 7* | chr1:216596228-216597072 | chr1:216422886-216423730 |              | Exon 1    | +                         | +                         | -                              | +                        | +                                 |
| 8  | chr1:216705232-216706130 | chr1:216531890-216532788 | <i>ESRRG</i> | Intron 7  | +                         | +                         | -                              | +                        | +                                 |
| 9  | chr1:216773974-216774910 | chr1:216600632-216601568 |              | Intron 5  | +                         | -                         | -                              | +/-                      | +                                 |
| 10 | chr1:216895153-216895595 | chr1:216721811-216722253 |              | Intron 3  | +                         | +                         | -                              | +/-                      | +                                 |

\* Region 7 is the predicted promoter of *USH2A*<sup>6,10</sup>. Data from human retina, mouse retina and mouse inner ear, was evaluated and each region was labeled with a '+' if a

regulatory element was expected based on the specific data set. The GeneHancer database was assessed for enhancers (+) and whether they associate (++) or not (+/-) with

the promoter of *USH2A*. Cherry *et al.* experimentally determined which regulatory regions were associated (+) or not (-) with the promoter of *USH2A*.



**Supplementary Table 4: Single nucleotide variants in putative regulatory regions.**

| Gene name    | Genomic location (hg19) | Variant        | Sample zygosity              | phyloP | CADD_PHRED | gnomAD -G AF (%) | SpliceAI _AG | SpliceAI _AL | SpliceAI _DG | SpliceAI _DL | SpliceSiteFinder-like (threshold: 75/100) | MaxEntScan (threshold AS: 12/16, DS: 9/12) | NNSPLICE (threshold: 0.75/1) | GeneSplicer (threshold AS: 15.75/21, DS: 18/24) |
|--------------|-------------------------|----------------|------------------------------|--------|------------|------------------|--------------|--------------|--------------|--------------|-------------------------------------------|--------------------------------------------|------------------------------|-------------------------------------------------|
| <i>USH2A</i> | 1:g.216228343C>G        | c.6050-6354G>C | I (hom), III (hom)           | 0.3    | 4.0        | 67.6             | 0            | 0            | 0            | 0            | -                                         | -                                          | -                            | -                                               |
| <i>USH2A</i> | 1:g.216264294A>G        | c.4759-1813T>C | I (hom), II (hom), III (hom) | 1.2    | 16.9       | 51.5             | 0            | 0            | 0            | 0            | -                                         | -                                          | -                            | -                                               |
| <i>USH2A</i> | 1:g.216408154G>A        | c.2810-2676C>T | I (hom), II (hom), III (hom) | -0.5   | 2.3        | 66.5             | 0            | 0            | 0            | 0            | -                                         | -                                          | -                            | -                                               |
| <i>USH2A</i> | 1:g.216561720G>A        | c.652-23293C>T | I (hom), II (hom), III (hom) | -0.7   | 0.5        | 59.6             | 0            | 0            | 0            | 0            | -                                         | -                                          | -                            | -                                               |
| <i>ESRRG</i> | 1:g.216705965T>C        | c.794-13202A>G | II (het)                     | 1.8    | 19.7       | 59.5             | 0            | 0            | 0            | 0            | -                                         | -                                          | -                            | -                                               |
| <i>ESRRG</i> | 1:g.216774662G>A        | c.521-33222C>T | I (hom), II (het), III (hom) | -0.4   | 2.8        | 15.0             | 0            | 0            | 0            | 0            | Gain of AS: 73.8 to 76.9 (3.1%)           | -                                          | -                            | -                                               |
| <i>ESRRG</i> | 1:g.216895167T>C        | c.-13-44334A>G | I (hom), II (hom), III (hom) | 0.4    | 15.2       | 98.9             | 0            | 0            | 0            | 0.01         | Loss of DS: 94.4 to 84.3 (-10.1%)         | Loss of DS: 10.6 to 9.5 (-9.2%)            | Loss of DS: 1 to 0.97 (-3%)  | -                                               |

GnomAD-G AF: Genome Aggregation Database: allele frequency in genome sequencing data, het: heterozygous, hom: homozygous. Splice prediction scores are obtained

with SpliceAI<sup>1</sup>, SpliceSiteFinder-like<sup>2</sup>, MaxEntScan<sup>3</sup>, NNSPLICE<sup>4</sup> and GeneSplicer<sup>5</sup>. AG: acceptor gain, AL: acceptor loss, DG: donor gain, DL: donor loss, AS: acceptor site, DS:

donor site.

**Supplementary Table 5: Single nucleotide variants in *PDZD7*.**

| Variant (NM_001195263.1) | Protein effect | Sample zygosity | phyloP | CADD_PHRED | Grantham Score | gnomAD-G AF (%) | SpliceAI_AG | SpliceAI_AL | SpliceAI_DG | SpliceAI_DL | SpliceSiteFinder-like (threshold: 75/100) | MaxEntScan (threshold AS: 12/16, DS: 9/12) | NNSPLICE (threshold: 0.75/1) | GeneSplicer (threshold AS: 15.75/21, DS: 18/24) |
|--------------------------|----------------|-----------------|--------|------------|----------------|-----------------|-------------|-------------|-------------|-------------|-------------------------------------------|--------------------------------------------|------------------------------|-------------------------------------------------|
| c.720-61T>G              |                | I (het)         | 0.4    | 8.6        | 0              | -               | 0.01        | 0           | 0.01        | 0           | -                                         | -                                          | -                            | -                                               |
| c.720-58A>G              |                | I (het)         | -0.3   | 6.2        | 0              | -               | 0.01        | 0           | 0.01        | 0           | -                                         | -                                          | -                            | -                                               |
| c.720-56T>G              |                | I (het)         | -1.2   | 0.6        | 0              | -               | 0.01        | 0           | 0           | 0           | -                                         | -                                          | -                            | -                                               |
| c.2325C>T                | p.(Arg775=)    | III (het)       | 0.2    | 18.1       | 0              | 0.01            | na          | na          | na          | na          | -                                         | -                                          | -                            | -                                               |
| c.2331T>C                | p.(Arg777=)    | III (het)       | 0.2    | 14.5       | 0              | 0.04            | na          | na          | na          | na          | -                                         | -                                          | -                            | -                                               |
| c.2618-250del            |                | I (het)         | -      | 1.3        | 0              | -               | na          | na          | na          | na          | -                                         | -                                          | -                            | -                                               |
| c.2618-250dup            |                | II (het)        | -0.9   | 0.1        | 0              | -               | na          | na          | na          | na          | -                                         | -                                          | -                            | -                                               |
| c.*587G>C                |                | II (het)        | 0.3    | 3.3        | 0              | 0.7             | na          | na          | na          | na          | -                                         | -                                          | -                            | -                                               |

GnomAD-G AF: Genome Aggregation Database: allele frequency in genome sequencing data, het: heterozygous, hom: homozygous. Splice prediction scores are obtained with SpliceAI<sup>1</sup>, SpliceSiteFinder-like<sup>2</sup>, MaxEntScan<sup>3</sup>, NNSPLICE<sup>4</sup> and GeneSplicer<sup>5</sup>. AG: acceptor gain, AL: acceptor loss, DG: donor gain, DL: donor loss, AS: acceptor site, DS: donor site.

**Supplementary Table 6: Primers used to amplify regions with potential unforeseen events due to CRISPR/Cas9 editing**

| <b>Target</b>                            | <b>Forward primer</b>        | <b>Reverse primer</b>   |
|------------------------------------------|------------------------------|-------------------------|
| <i>ush2a</i> exon 13 genomic analysis    | CCAACAGAATCTAAATCTTTCTGGG    | GCTGGCACATAACAAATAACAC  |
| <i>ush2a</i> mRNA analysis (exons 11-13) | CCGTGCAGCCAGATATTACC         | TGTATCTGCCTACCCACACG    |
| chr5:40167334 (GRCz10)                   | ATTTAGCCGGTTAGCGTGTG         | AGTCTTTGCCTTTGCCTGAT    |
| chr10:44374669 (GRCz10)                  | Failed to obtain PCR product |                         |
| chr17:25767450 (GRCz10)                  | TGGCTGCCCTTAGTTAAAAC         | AAGCATTAAAACACACAAAATGG |
| chr20:41755468 (GRCz10)                  | GCAATTTCAGAACTAGTACAGCC      | CCGTCACTACTTCACACACG    |

**Supplementary Table 7: Clinical data of three arRP cases, homozygous for *USH2A* c.2276G>T**

| Case | Sex | Ethnicity | Diagnosis            | Age at diagnosis | Current age (2021) | Visual acuity (RE)                  | Visual acuity (LE)                   | Fundus                                                                         | Autofluorescence                                                                        | OCT                                                       | Visual field (Goldmann)                                                                                                     | ERG                                             |
|------|-----|-----------|----------------------|------------------|--------------------|-------------------------------------|--------------------------------------|--------------------------------------------------------------------------------|-----------------------------------------------------------------------------------------|-----------------------------------------------------------|-----------------------------------------------------------------------------------------------------------------------------|-------------------------------------------------|
| I    | M   | Dutch     | Retinitis pigmentosa | 32               | 43                 | 2010: 0.7                           | 2010: 0.8                            | Pallor of optic disc, attenuated vessels, bone spicules                        | NA                                                                                      | NA                                                        | 2014: relative decrease of peripheral sensitivity                                                                           | NA                                              |
| II   | F   | Dutch     | Retinitis pigmentosa | 53               | 66                 | 2017: 0.9<br>2019: S+1.25 C-0,50x75 | 2017: 0.8<br>2019: S+1.25 C-1.00x102 | Waxy optic disc, dull macula, attenuated vessels, far-peripheral bone spicules | 2017: hypoautofluorescent ring at the vascular arcades and surrounding the macular area | 2017: loss of photoreceptor layers, with central residue. | 2018: ring scotoma 15-35 degrees.                                                                                           | 2017: decreased photopic and scotopic responses |
| III  | M   | Dutch     | Retinitis pigmentosa | 61               | 73                 | 2008: 0,9<br>S 0.00 C-0.50 x95      | 2008: 0.7<br>(S+1.25 C-0.75x85)      | 2009: peripheral chorioretinal atrophy with residual preserved center          | 2008: chorioretinal atrophy                                                             | 2017: central residue of photoreceptors                   | 2008: tunnel vision (loss of peripheral vision, and preserved central vision) with peripheral residue superior and inferior | NA                                              |

ERG: electroretinogram, F: female, LE: left eye, M: male, NA: not analyzed, OCT: optical coherence tomography, RE: right eye

**Supplementary Table 8: List of arRP-associated genes**

|                 |                |                        |                 |                |                |                |               |
|-----------------|----------------|------------------------|-----------------|----------------|----------------|----------------|---------------|
| <i>ABCA4</i>    | <i>BEST1</i>   | <i>CRB1</i>            | <i>HGSNAT</i>   | <i>MAK</i>     | <i>PDE6B</i>   | <i>RHO</i>     | <i>SPATA7</i> |
| <i>AGBL5</i>    | <i>C2orf71</i> | <i>CYP4V2</i>          | <i>IDH3B</i>    | <i>MERTK</i>   | <i>PDE6G</i>   | <i>RLBP1</i>   | <i>TRNT1</i>  |
| <i>AHR</i>      | <i>C8orf37</i> | <i>DHDDS</i>           | <i>IFT140</i>   | <i>MVK</i>     | <i>POMGNT1</i> | <i>RP1</i>     | <i>TTC8</i>   |
| <i>ARHGEF18</i> | <i>CERKL</i>   | <i>DHX38</i>           | <i>IFT172</i>   | <i>NEK2</i>    | <i>PRCD</i>    | <i>RP1L1</i>   | <i>TULP1</i>  |
| <i>ARL2BP</i>   | <i>CLCC1</i>   | <i>EMC1</i>            | <i>IMPG2</i>    | <i>NEUROD1</i> | <i>PROM1</i>   | <i>RPE65</i>   | <i>USH2A</i>  |
| <i>ARL6</i>     | <i>CLRN1</i>   | <i>EYS</i>             | <i>KIAA1549</i> | <i>NR2E3</i>   | <i>RBP3</i>    | <i>SAG</i>     | <i>ZNF408</i> |
| <i>BBS1</i>     | <i>CNGA1</i>   | <i>FAM161A</i>         | <i>KIZ</i>      | <i>NRL</i>     | <i>REEP6</i>   | <i>SAMD11</i>  | <i>ZNF513</i> |
| <i>BBS2</i>     | <i>CNGB1</i>   | <i>GPR125 (ADGRA3)</i> | <i>LRAT</i>     | <i>PDE6A</i>   | <i>RGR</i>     | <i>SLC7A14</i> |               |

Genes obtained from Retnet (visited May 21, 2021)<sup>11</sup>.

## Supplementary References

- 1 Jaganathan, K. *et al.* Predicting Splicing from Primary Sequence with Deep Learning. *Cell* **176**, 535-548.e524, doi:10.1016/j.cell.2018.12.015 (2019).
- 2 Shapiro, M. B. & Senapathy, P. RNA splice junctions of different classes of eukaryotes: sequence statistics and functional implications in gene expression. *Nucleic Acids Res* **15**, 7155-7174, doi:10.1093/nar/15.17.7155 (1987).
- 3 Yeo, G. & Burge, C. B. Maximum entropy modeling of short sequence motifs with applications to RNA splicing signals. *J Comput Biol* **11**, 377-394, doi:10.1089/1066527041410418 (2004).
- 4 Reese, M. G., Eeckman, F. H., Kulp, D. & Haussler, D. Improved splice site detection in Genie. *J Comput Biol* **4**, 311-323, doi:10.1089/cmb.1997.4.311 (1997).
- 5 Pertea, M., Lin, X. & Salzberg, S. L. GeneSplicer: a new computational method for splice site prediction. *Nucleic Acids Res* **29**, 1185-1190, doi:10.1093/nar/29.5.1185 (2001).
- 6 Cherry, T. J. *et al.* Mapping the cis-regulatory architecture of the human retina reveals noncoding genetic variation in disease. *Proc Natl Acad Sci U S A* **117**, 9001-9012, doi:10.1073/pnas.1922501117 (2020).
- 7 Mo, A. *et al.* Epigenomic landscapes of retinal rods and cones. *Elife* **5**, e11613, doi:10.7554/eLife.11613 (2016).
- 8 Muthu, V. *et al.* Genomic architecture of Shh-dependent cochlear morphogenesis. *Development* **146**, doi:10.1242/dev.181339 (2019).
- 9 Yizhar-Barnea, O. *et al.* DNA methylation dynamics during embryonic development and postnatal maturation of the mouse auditory sensory epithelium. *Sci Rep* **8**, 17348, doi:10.1038/s41598-018-35587-x (2018).
- 10 Fishilevich, S. *et al.* GeneHancer: genome-wide integration of enhancers and target genes in GeneCards. *Database (Oxford)* **2017**, doi:10.1093/database/bax028 (2017).
- 11 Daiger, S. R., B.J.F.; Greenberg, J.; Christoffels, A.; Hide, W. *RetNet, the Retinal Information Network*, <<https://sph.uth.edu/RetNet/>> (1998).
